# Supplementary material for: Interactive Voice Response Technology Can Deliver Alcohol Screening and Brief Intervention in Primary Care
Source: Springer Nature journal article supplement (doi:10.1007/s11606-009-1233-0), 2010-02-01
Supplement: MOESM1 [file 11606_2009_1233_MOESM1_ESM.doc]

**Appendix: IVR-Screen**

Welcome to the Essex Health Screen. We are researching this phone system as a way to ask questions for your office visit today. We would like to ask you 6 questions about your health. You can skip any you prefer not to answer. Your provider will get a printout of your answers. Based on your answers we may invite you to participate in other research. Be sure to ask your provider if you have any questions.

If you have completed this screen in the last six months, press 1. To proceed with the interview, press 2. If you prefer not to do the interview, press 3.

**IF 3**: Okay, please take a seat in the waiting room. Goodbye. **END OF CALL**

**IF 1**: Okay, thank you. It’s not necessary to do the screen again. Please take a seat in the waiting room. Goodbye. **END OF CALL**

**IF 2**: Thank you. Please enter the 4-digit number the receptionist gave you now.

Please enter the 4-digit year of your birth.

**IF YEAR>1989:** Are you 18 years of age or older?, If no, press 0. If yes, press 1

**IF 0**: Participants must be 18 years or older. Thank you for your interest in participating. Goodbye. **END OF CALL**

Please press 1 if you are a female or 2 if you are a male.

Here are the health questions. If you want to skip any question, press the star key on the lower left of the keypad:

1. Are you having any pain today? If no, press 0. If yes, press 1.

**IF 0: GO TO ITEM 2**

**IF 1**: Please rate your highest level of pain today from 1 to 10, with 1 being the mildest and 10 being the most severe pain you’ve ever had. Then press pound on the lower right of the keypad.

1. Do you smoke cigarettes? If no, press 0. If yes, press 1.

**IF 0: GO TO ITEM 3**

**IF 1**: About how many cigarettes do you smoke in a day? Enter the number, then press pound on the lower right of the keypad.

1. In general, do you feel you drink more alcohol than you should? If no, press 0, if yes, press 1; if you’re not sure, press 2.
2. **IF MALE:** How often do you have five or more drinks on one occasion? If never, press 0. Less than monthly, press 1. Monthly, press 2. Weekly, press 3. Daily or almost daily, press 4. To hear these options again, press 9.

**IF FEMALE:** How often do you have four or more drinks on one occasion? If never, press 0. Less than monthly, press 1. Monthly, press 2. Weekly, press 3. Daily or almost daily, press 4. To hear these options again, press 9.

1. How physically active are you? Not very physically active, press 0, somewhat active, press 1, very physically active, press 2.
2. In the past two weeks, have you been feeling down, depressed, or hopeless? If no, press 0. If yes, press 1.

Thank you for completing this screening questionnaire.

| **IF QUES. 3=0 AND QUES. 4=0:** Please take a seat in the waiting room. Goodbye. **END OF CALL.** | **IF QUES. 3=0 AND QUES. 4=1**:  **IF MALE:** You indicated you sometimes drink more than 5 drinks on one occasion.  **IF FEMALE:** You indicated you sometimes drink more than 4 drinks on one occasion.  **ALL:** This amount of alcohol can affect your health and interfere with some medical treatments.  We would like your help in testing a health information line that provides advice and recommendations about drinking and health. | **IF QUES. 3=1**: You indicated you feel you are drinking more than you should.  We would like your help in testing a health information line that provides advice and recommendations to people who are concerned about their drinking. | **IF QUES. 3=2**: You indicated you are not sure if you’re drinking more than you should.  We would like your help in testing a health information line that provides information about alcohol and health, and offers advice and recommenda-tions to people who are concerned about their drinking. |
| --- | --- | --- | --- |
|  | If you are willing, we’d like you to test it after you leave the clinic and give us your feedback. It is totally automated and completely confidential, and none of the information goes into your medical record. The medical assistant will discuss it with you when he or she takes you to the exam room.  We also encourage you to discuss your drinking with your provider during your visit today.  Thank you for your call. Please take a seat in the waiting room. Goodbye. **END OF CALL.** | | |

**[DISCONNECT**]
